# Supplementary material
Source: PubMed Central journal article supplement (PMC4522690)
Supplement: NIHMS708487-supplement-Supporting_Information.pdf [file NIHMS708487-supplement-Supporting_Information.pdf]

## Supporting Information

### **Substituted Bis-THF Protease Inhibitors with Improved Potency against Highly Resistant Mature HIV-1 Protease PR20**

Johnson Agniswamy<sup>a</sup>, John M. Louis<sup>b</sup>, Chen-Hsiang Shen<sup>a</sup>, Sofiya Yashchuk<sup>c</sup>, Arun K. Ghosh<sup>c</sup>,  
Irene T. Weber<sup>a\*</sup>

<sup>a</sup>Department of Biology, Molecular Basis of Disease Program, Georgia State University, Atlanta, GA30303; <sup>b</sup>Laboratory of Chemical Physics, National Institute of Diabetes and Digestive and Kidney Diseases, National Institutes of Health, DHHS, Bethesda, MD 20892-0520; <sup>c</sup>Department of Chemistry and Medicinal Chemistry, Purdue University, West Lafayette, IN 47907.

\*Corresponding author

Figure S1. Dose-response for the inhibition of autocatalytic processing of wild-type TFR-PR and TFR-PR20 precursors in *E. coli* by GRL-4410A and GRL-5010A provided in the culture medium as described previously<sup>1-2</sup>. Final concentrations ( $\mu\text{M}$ ) of inhibitor added to the medium are indicated above the lanes. Maximum accumulation of TFR-PR precursor is observed with 4  $\mu\text{M}$  PI with an IC50 value of 1-2  $\mu\text{M}$  similar to earlier studies with DRV under identical conditions. In contrast, no inhibition of the autoprocessing of TFR-PR20 is observed with GRL-4410A (C) or GRL-5010A (D) indicated by the absence of any accumulation of precursor. Bands indicated by arrows denote full length TFR-PR precursor (a) and mature PR or PR20 (b). Lane M denotes molecular weight standards in kDa. Proteins were subjected to 20% homogeneous PhastGel SDS-PAGE and visualized by PhastGel blue R staining.

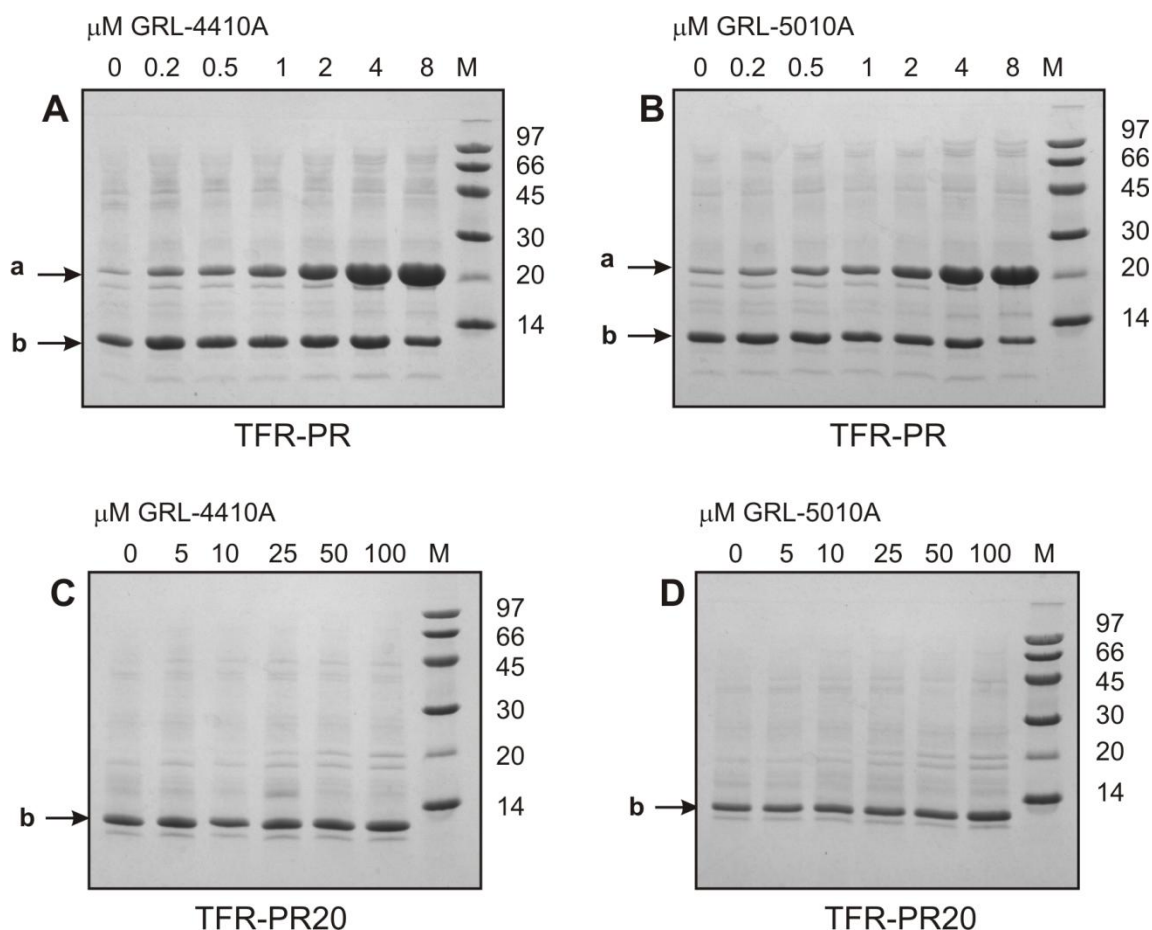

- (1) Louis, J. M., Aniana, A., Weber, I. T., and Sayer, J. M. (2011) Inhibition of autoprocessing of natural variants and multidrug resistant mutant precursors of HIV-1 protease by clinical inhibitors. *Proc Natl Acad Sci U S A* 108, 9072-9077.
- (2) Agniswamy, J., Shen, C. H., Wang, Y. F., Ghosh, A. K., Rao, K. V., Xu, C. X., Sayer, J. M., Louis, J. M., and Weber, I. T. (2013) Extreme multidrug resistant HIV-1 protease with 20 mutations is resistant to novel protease inhibitors with P1'-pyrrolidinone or P2-tris-tetrahydrofuran. *J Med Chem* 56, 4017-4027.
